# Supplementary material for: Antioxidant and Biological Activities of Acacia saligna and Lawsonia inermis Natural Populations
Source: PubMed Central journal article supplement (PMC7411707; doi:10.3390/plants9070908), 2020-07-17
Supplement: plants-09-00908-s001.pdf [file plants-09-00908-s001.pdf]

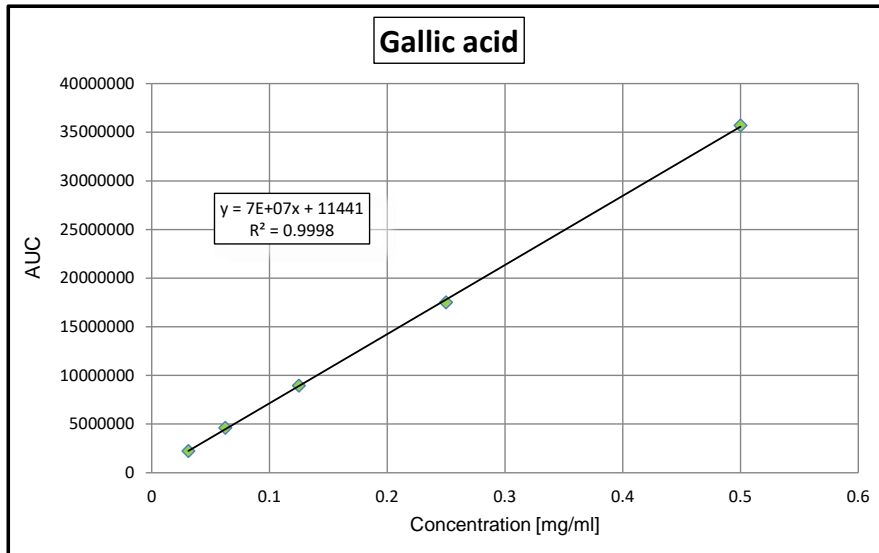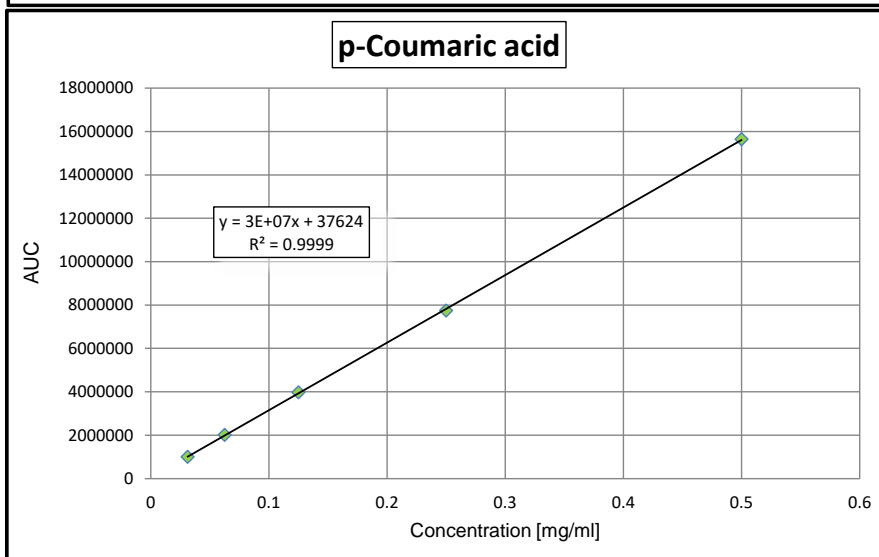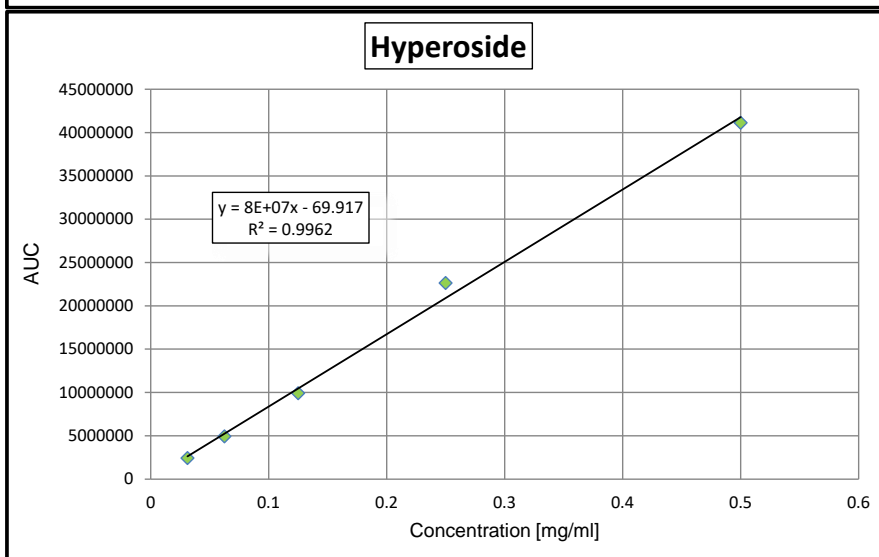

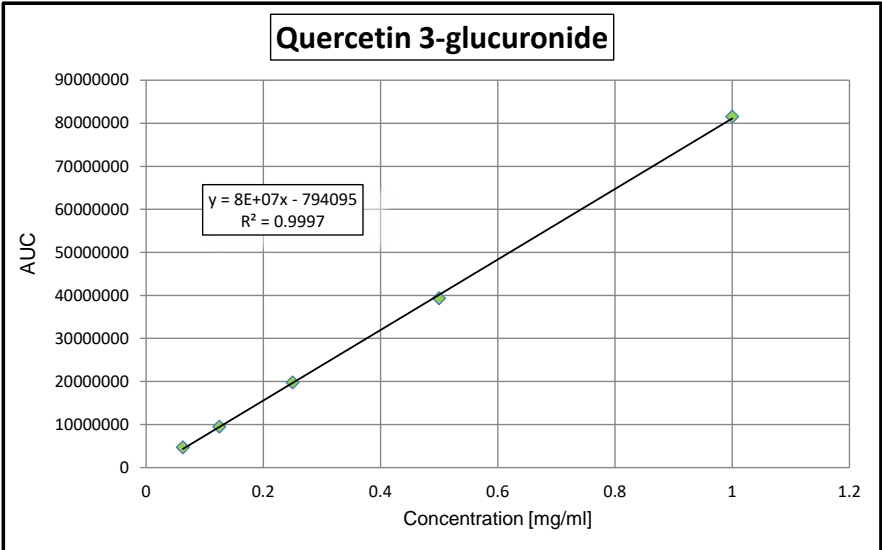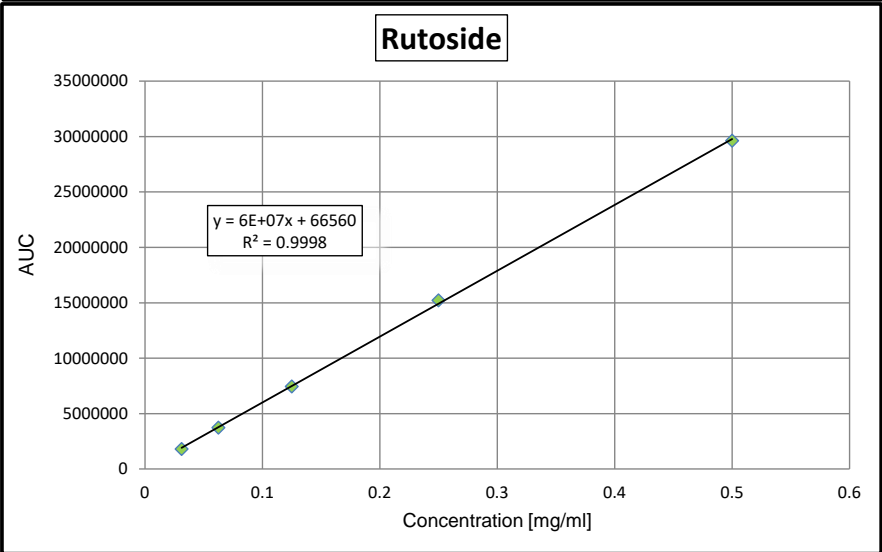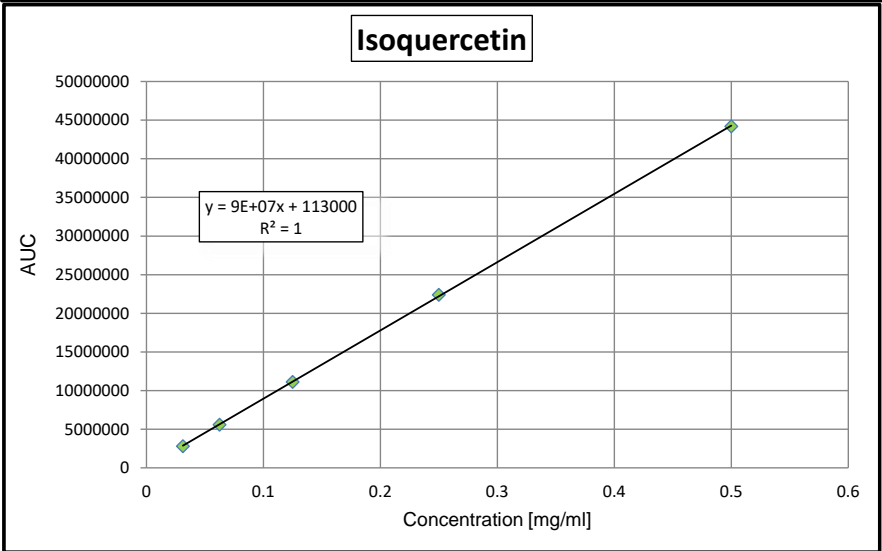

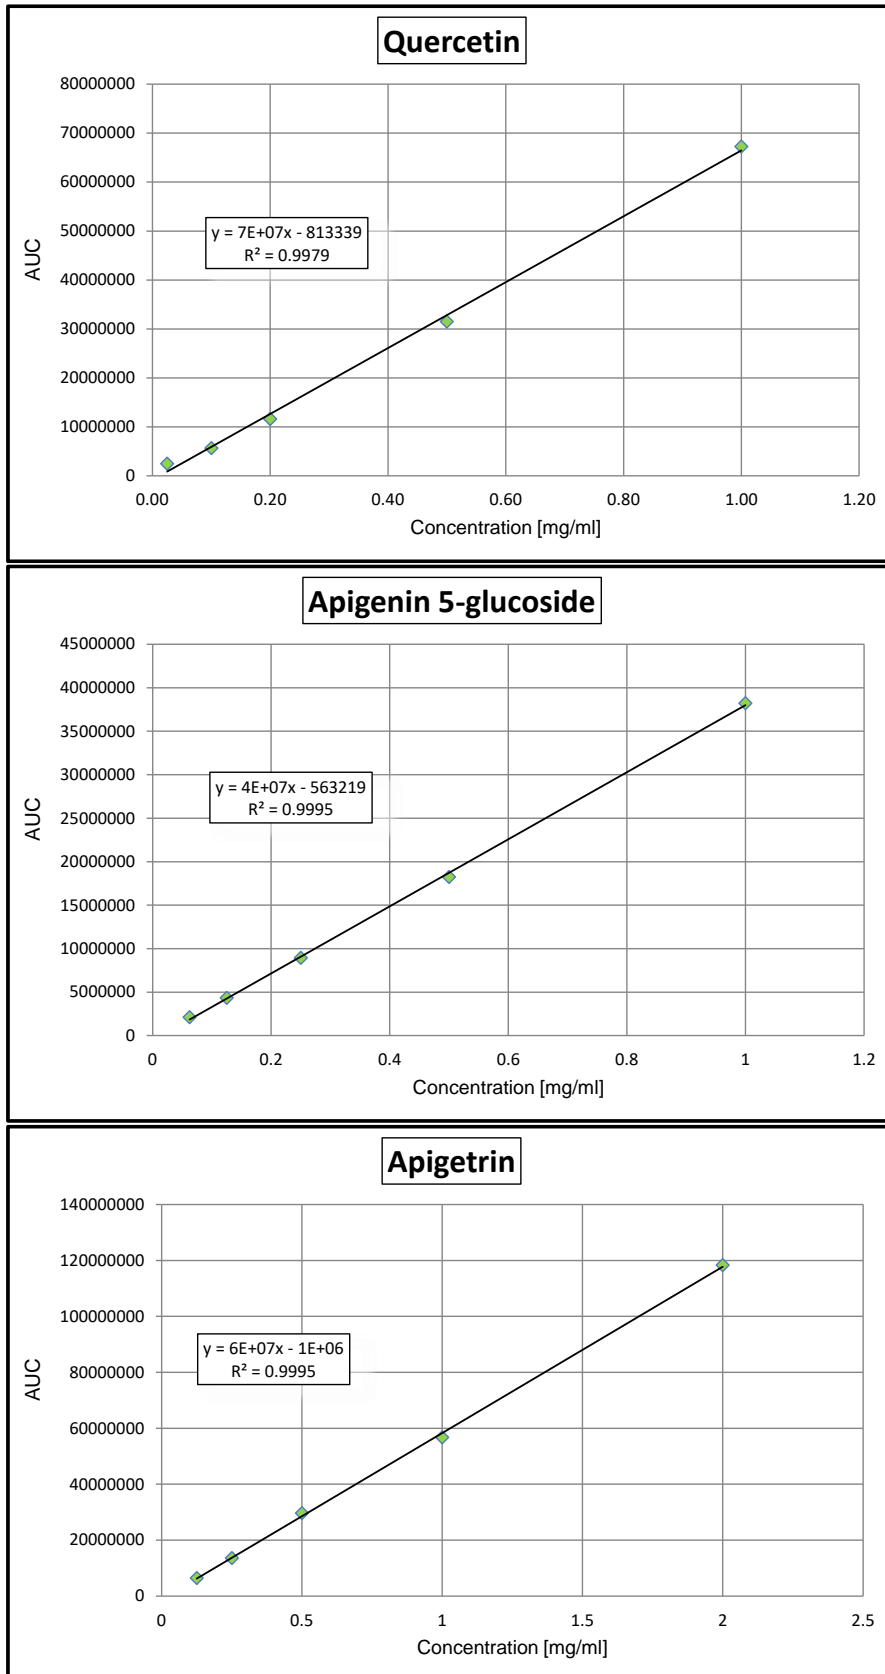

**Figure S1.** The calibration curves of detected compounds.
